# Supplementary material
Source: Springer Nature journal article supplement (https://www.springermedizin.de/resource/supplementary/12891_2008_676_MOESM5_ESM.pdf/9506544)

| <b>Study</b>           | <b>SES</b>  | <b>95% CI</b> | <b>CI</b>   |
|------------------------|-------------|---------------|-------------|
| Jan                    | 0.40        | -0.16         | 0.95        |
| Johnsson 6 months      | 0.66        | -0.09         | 1.42        |
| Sashika groups 1 and 2 | 0.35        | -0.56         | 1.26        |
| <b>Summary</b>         | <b>0.46</b> | <b>0.061</b>  | <b>0.86</b> |

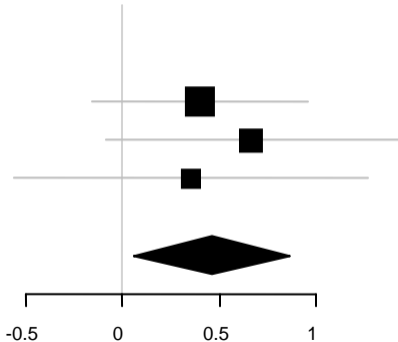

Supplement: MOESM5 [file 9506544]
